# Supplementary material for: Prenatal Exposure to Favorable Social and Environmental Neighborhood Conditions Is Associated with Healthy Pregnancy and Infant Outcomes
Source: MDPI journal article supplement (doi:10.3390/ijerph18116161), 2021-06-07
Supplement: s1 [file s1]

Supplemental Table S1. Child Opportunity Index (COI) domains and indicators

| Domain               | Indicator                                   | Description (source)                                                                                                                |
|----------------------|---------------------------------------------|-------------------------------------------------------------------------------------------------------------------------------------|
| Education            | Early childhood education (ECE) centers     | Number of ECE centers within a 5-mile radius (data collection from state and federal sources)                                       |
|                      | High-quality ECE centers                    | Number of NAEYC accredited centers within a 5-mile radius (data collection from state and federal sources)                          |
|                      | ECE enrollment                              | Percent 3- and 4-year-olds enrolled in nursery school, preschool or kindergarten (ACS)                                              |
|                      | Third grade reading proficiency             | Percent third graders scoring proficient on standardized reading tests, converted to NAEP scale score points (EDFacts, GS and SEDA) |
|                      | Third grade math proficiency                | Percent third graders scoring proficient on standardized math tests, converted to NAEP scale score points (EDFacts, GS and SEDA)    |
|                      | High school graduation rate                 | Percent ninth graders graduating from high school on time (EDFacts and GS)                                                          |
|                      | Advanced Placement (AP) course enrollment   | Ratio of students enrolled in at least one AP course to the number of 11 <sup>th</sup> and 12 <sup>th</sup> graders (CRDC)          |
|                      | College enrollment in nearby institutions   | Percent 18-24 year-olds enrolled in college within 25-mile radius (ACS)                                                             |
|                      | School poverty                              | Percent students in elementary schools eligible for free or reduced-price lunches, reversed (NCES CCD)                              |
|                      | Teacher experience                          | Percent teachers in their first and second year, reversed (CRDC)                                                                    |
|                      | Adult educational attainment                | Percent adults ages 25 and over with a college degree or higher (ACS)                                                               |
| Health & Environment | Access to healthy food                      | Percent households without a car located further than a half-mile from the nearest supermarket, reversed (USDA)                     |
|                      | Access to green space                       | Percent impenetrable surface areas such as rooftops, roads, or parking lots, reversed (CDC)                                         |
|                      | Walkability                                 | EPA Walkability Index (EPA)                                                                                                         |
|                      | Housing vacancy rate                        | Percent housing units that are vacant, reversed (ACS)                                                                               |
|                      | Hazardous waste dump sites                  | Average number of Superfund sites within a 2-mile radius, reversed (EPA)                                                            |
|                      | Industrial pollutants in air, water or soil | Index of toxic chemical released by industrial facilities, reversed (EPA)                                                           |

|                   |                           |                                                                                                                                                                                                                                      |
|-------------------|---------------------------|--------------------------------------------------------------------------------------------------------------------------------------------------------------------------------------------------------------------------------------|
|                   | Airborne microparticles   | Mean estimated microparticle (PM2.5) concentration, reversed (CDC)                                                                                                                                                                   |
|                   | Ozone concentration       | Mean estimated 8-hour average ozone concentration, reversed (EPA)                                                                                                                                                                    |
|                   | Extreme heat exposure     | Summer days with maximum temperature above 90F, reversed (CDC)                                                                                                                                                                       |
|                   | Health insurance coverage | Percent individuals ages 0-64 with health insurance coverage (ACS)                                                                                                                                                                   |
| Social & Economic | Employment rate           | Percent adults ages 25-54 who are employed (ACS)                                                                                                                                                                                     |
|                   | Commute duration          | Percent workers commuting more than one hour one way, reversed (ACS)                                                                                                                                                                 |
|                   | Poverty rate              | Percent individuals living in households with incomes below 100% of the federal poverty threshold, reversed (ACS)                                                                                                                    |
|                   | Homeownership rate        | Percent owner-occupied housing units (ACS)                                                                                                                                                                                           |
|                   | High-skill employment     | Percent individuals ages 16 and over employed in management, business, financial, computer, engineering, science, education, legal, community service, health care practitioner, health technology, arts and media occupations (ACS) |
|                   | Median household income   | Median income of all households (ACS)                                                                                                                                                                                                |
|                   | Single-headed households  | Percent family households that are single-parent headed, reversed (ACS)                                                                                                                                                              |

---

Abstracted from: Noelke, C., McArdle, N., Baek, M., Huntington, N., Huber, R., Hardy, E., & Acevedo-Garcia, D. (2020). Child Opportunity Index 2.0 Technical Documentation. Retrieved from [diversitydatakids.org/research-library/research-brief/how-we-built-it](https://diversitydatakids.org/research-library/research-brief/how-we-built-it).

Abbreviations: ACS = American Community Survey; CDC = Centers for Disease Control and Prevention; CRDC = Civil Rights Data Collection; EPA = Environmental Protection Agency; EDFacts = U.S. Department of Education EDFacts Data ; GS = GreatSchools; NCES CCD = National Center for Health Statistics Common Core of Data; SEDA = Stanford Education Data Archive; USDA = United States Department of Agriculture

---

Supplemental Table S2. Adjusted associations between neighborhood level child opportunity and birth outcomes, with and without controlling for gestational age (GA)

| Outcome             | Model set 1: Controlled for GA |        |       | Model set 2: Not controlled for GA |        |      |
|---------------------|--------------------------------|--------|-------|------------------------------------|--------|------|
|                     | $\beta$                        | $SE$   | $p$   | $\beta$                            | $SE$   | $p$  |
| Gestational age     | -                              | -      | -     | -0.005                             | 0.004  | 0.19 |
| Birth weight        | 0.003                          | 0.001  | 0.002 | 0.002                              | 0.001  | 0.05 |
| Birth length        | 0.02                           | 0.005  | 0.003 | 0.01                               | 0.006  | 0.05 |
| Head circumference  | 0.004                          | 0.004  | 0.29  | 0.001                              | 0.004  | 0.85 |
| Cephalization index | -0.001                         | 0.0003 | 0.07  | -0.001                             | 0.0005 | 0.04 |

All models were adjusted for maternal age, race/ethnicity, smoking during pregnancy, and child sex.  
Model set 1 additionally controls for gestational age at delivery.

Supplemental Table S3. Inputs and Sobel tests to determine whether maternal depression or diet during pregnancy mediate the association between COI and birth outcomes

|                      | COI → Mediator<br>[a path]<br>β (SE) | Mediator → Outcome;<br>COI in the model<br>[b path]<br>β (SE) | Sobel test (SE) | p-value |
|----------------------|--------------------------------------|---------------------------------------------------------------|-----------------|---------|
| <i>Birth weight</i>  |                                      |                                                               |                 |         |
| Depression           | -0.03 (0.01)                         | -2.19 (7.85)                                                  | 0.28 (0.27)     | 0.78    |
| Diet                 | -0.11 (0.0)                          | -7.18 (2.67)                                                  | 2.33 (0.33)     | 0.02    |
| <i>Birth length</i>  |                                      |                                                               |                 |         |
| Depression           | -0.03 (0.01)                         | -0.07 (0.04)                                                  | 1.37 (0.002)    | 0.17    |
| Diet                 | -0.11 (0.02)                         | -0.04 (0.02)                                                  | 1.99 (0.005)    | 0.045   |
| <i>Cephalization</i> |                                      |                                                               |                 |         |
| Depression           | -0.03 (0.01)                         | -0.001 (0.003)                                                | 0.43 (0.0001)   | 0.66    |
| Diet                 | -0.11 (0.02)                         | 0.002 (0.001)                                                 | -1.46 (0.0001)  | 0.14    |

Notes. The Sobel test statistic is calculated with this formula:  $z\text{-value} = a*b/\text{SQRT}(b^2*s_a^2 + a^2*s_b^2)$ , where a= regression coefficient for the association between the independent variable and mediator (e.g., COI predicting maternal factor), and b= regression coefficient for the association between the mediator and the dependent variable, with the independent variable in the model (Maternal factor predicting infant outcome, COI in the model as a covariate).
